# Supplementary material for: MUC1-C regulates lineage plasticity driving progression to neuroendocrine prostate cancer
Source: PubMed Central journal article supplement (PMC6969104; doi:10.1038/s41467-019-14219-6), 2020-01-17
Supplement: 41467_2019_14219_MOESM1_ESM.pdf [file 41467_2019_14219_MOESM1_ESM.pdf]

MUC1-C REGULATES LINEAGE PLASTICITY  
DRIVING PROGRESSION TO NEUROENDOCRINE PROSTATE CANCER

Yasumizu Y., et.al.

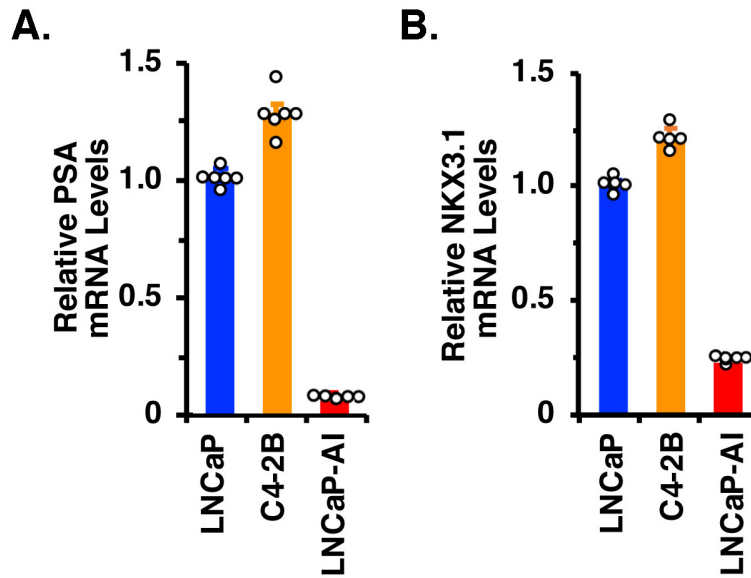

**Supplementary Figure 1. Downregulation of PSA and NKX3.1 mRNA levels in LNCaP-AI cells.** a and b. LNCaP, C4-2B and LNCaP-AI cells were analyzed for PSA (a) and NKX3.1 (b) mRNA levels by qRT-PCR using primers listed in Supplementary Table 1. The results (mean±SD of five determinations) are expressed as relative mRNA levels compared to that obtained for LNCaP cells (assigned a value of 1). Source data are provided as a Source Data file.

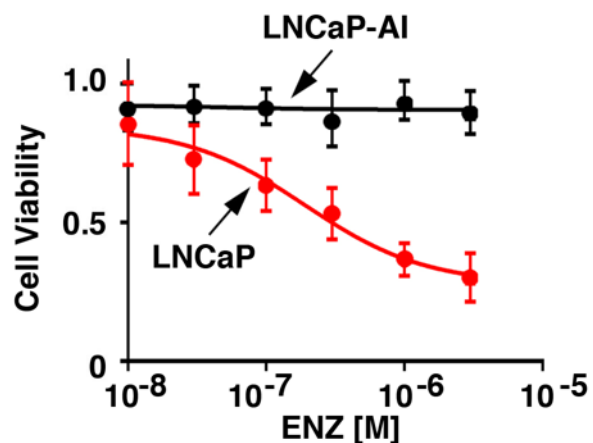

**Supplementary Figure 2. LNCaP-AI cells are resistant to ENZ treatment.** LNCaP and LNCaP-AI cells treated with the indicated concentrations of enzalutamide (ENZ) for 72 h were monitored for viability by trypan blue exclusion. The results (mean±SD of five determinations) are expressed as relative cell viability compared to that obtained for control untreated cells (assigned a value of 1). Source data are provided as a Source Data file.

**A. Phase Contrast**

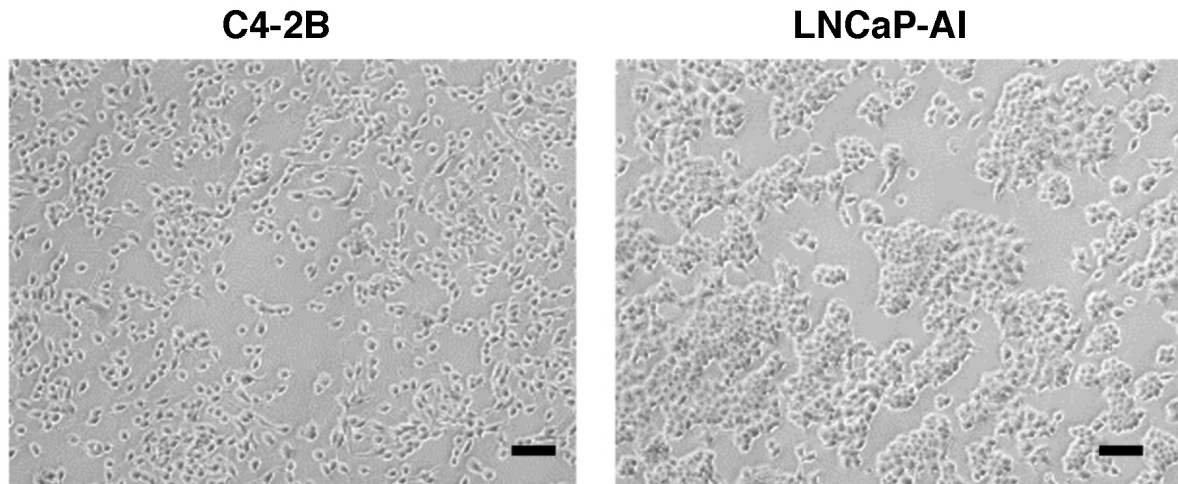

**B. H&E Staining**

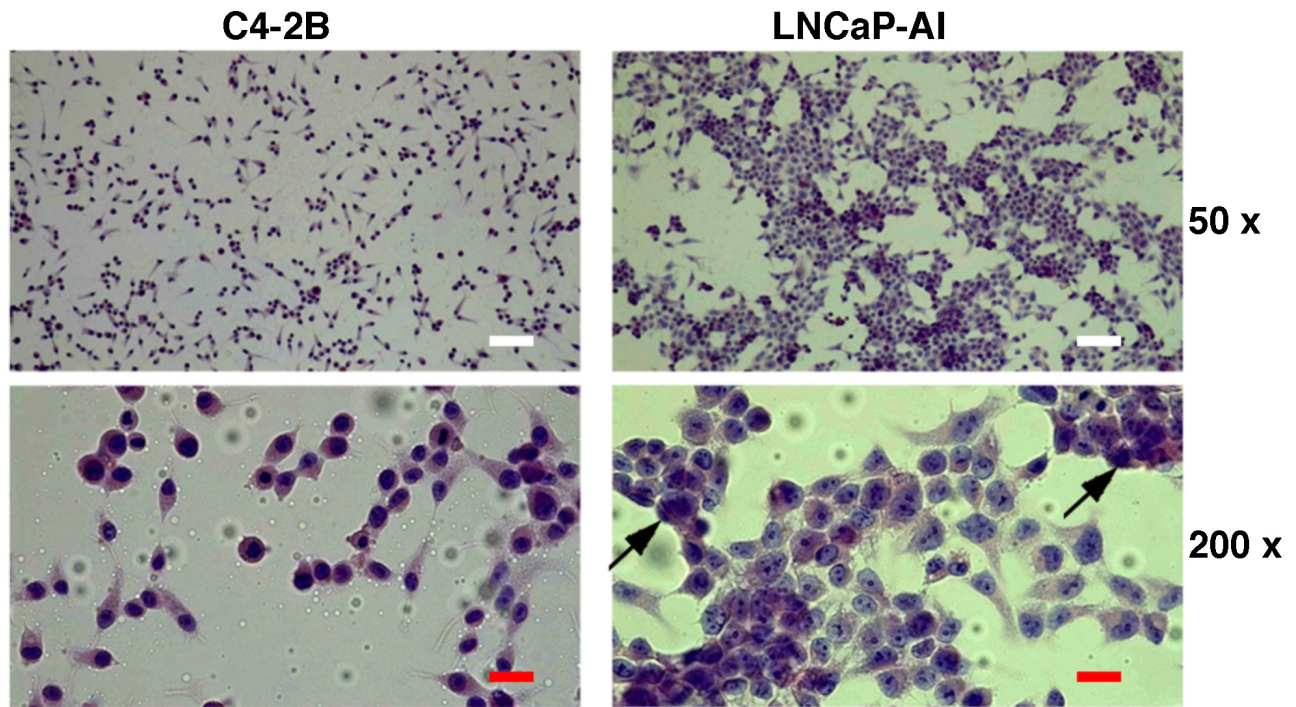

**Supplementary Figure 3. Morphologic features of C4-2B and LNCaP-AI cells.** a. Phase contrast visualization of C4-2B (left) and LNCaP-AI (right) cells growing as monolayers in culture. Scale bar: 100  $\mu$ m. b. C4-2B (left panels) and LNCaP-AI (right panels) cells were stained with H&E and images were captured by microscopy at the indicated magnifications. Giant cells with smudgy appearing chromatin are highlighted with arrows. White scale bar: 100  $\mu$ m. Red scale bar: 25  $\mu$ m.

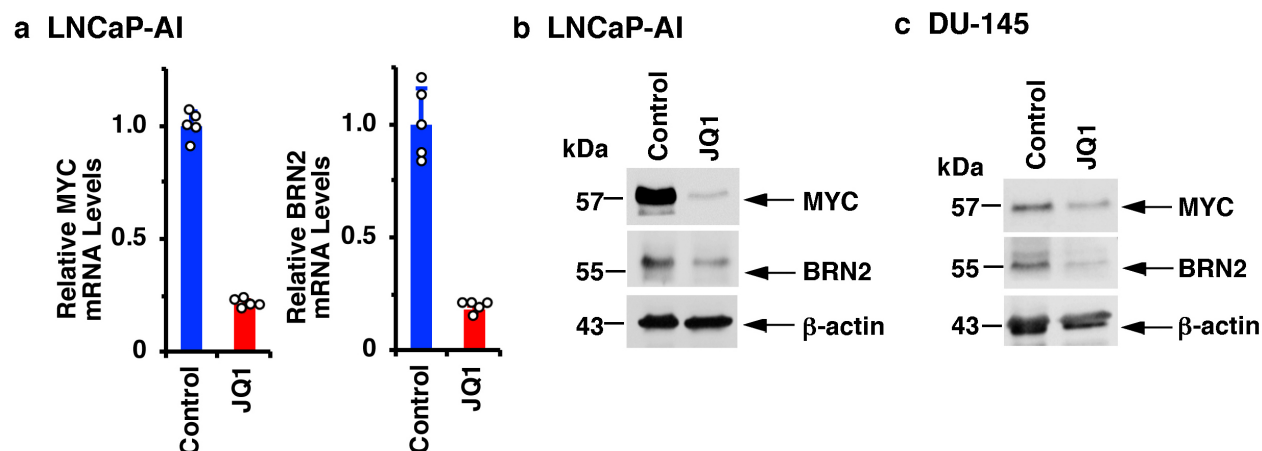

**Supplementary Figure 4. Targeting MYC with JQ1 treatment suppresses BRN2 expression.** a. LNCaP-AI cells treated with control vehicle (0.1% DMSO) or 5  $\mu$ M JQ1 for 24 h were analyzed for MYC (left) and BRN2 (right) mRNA levels by qRT-PCR. The results (mean $\pm$ SD of five determinations) are expressed as relative mRNA levels compared to that obtained for control cells (assigned a value of 1). b and c. Lysates from LNCaP-AI (b) and DU-145 (c) cells treated with control vehicle or 5  $\mu$ M JQ1 for 72 h were immunoblotted with antibodies against the indicated proteins. Source data are provided as a Source Data file.

## Prostate Cancer Cell Lines mRNA Expression

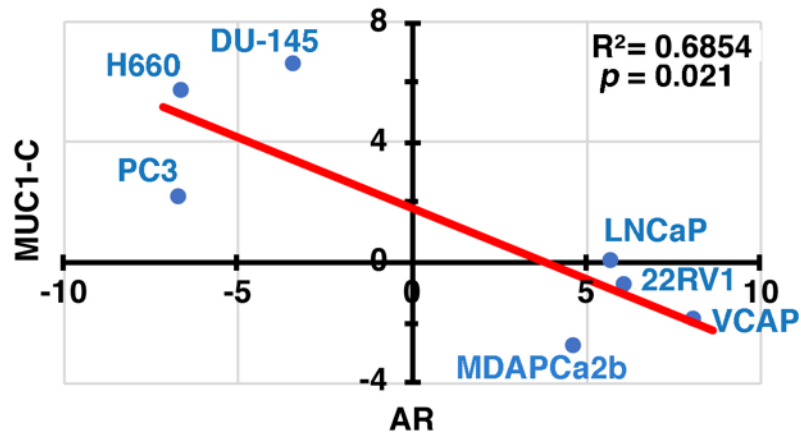

**Supplementary Figure 5. Inverse correlation between MUC1 and AR expression in PC cell lines.** Datasets from the “Next-generation Characterization of the Cancer Cell Line Encyclopedia” were analyzed for MUC1 and AR expression in PC cell lines.

## a DU-145

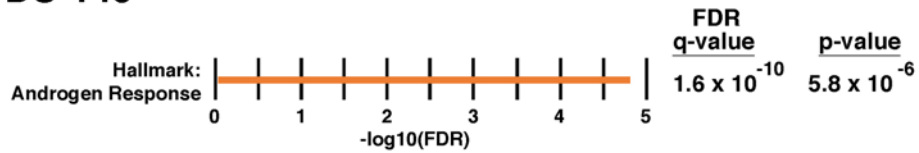

## b DU-145/tet-MUC1shRNA

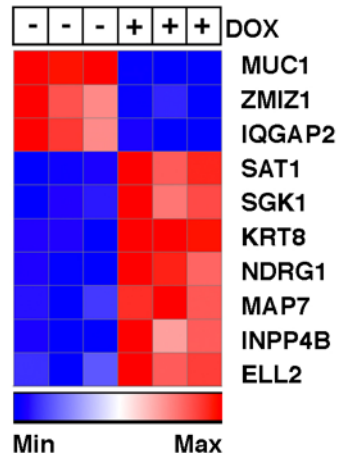

**Supplementary Figure 6. MUC1-C regulates the Hallmark Androgen Response Pathway Gene Set.** RNA-seq was performed in triplicate on DU-145/tet-MUC1shRNA cells treated with vehicle or 500 ng/ml DOX for 7 days. The datasets were analyzed using Hallmark for gene enrichment.

**Supplementary Table 1. Primers used for qRT-PCR.**

| <b>Primer</b> | <b>FWD</b>                | <b>REV</b>                |
|---------------|---------------------------|---------------------------|
| GAPDH         | CCATGGAGAAGGCTGGGG        | CAAAGTTGTCATGGATGACC      |
| PSA (KLK3)    | CACAGCCTGTTTCATCCTGA      | AGGTCCATGACCTTCACAGC      |
| NKX3.1        | GGACTGAGTGAGCCTTTTGC      | CAGCCAGATTTCTCCTTTGC      |
| MUC1          | TACCGATCGTAGCCCCTATG      | CTCACCAGCCCAAACAGG        |
| EZH2          | CCCTGACCTCTGTCTTACTTGTGGA | ACGTCAGATGGTGCCAGCAATA    |
| MYC           | TTCGGGTAGTGGAAAACAG       | AGTAGAAATACGGCTGCACC      |
| AURKA         | CCACCTTCGGCATCCTAATA      | TCCAAGTGGTGCATATTCCA      |
| ASCL1         | CCCAAGCAAGTCAAGCGACA      | AAGCCGCTGAAGTTGAGCC       |
| SYP           | TCAGTTCCGGGTGGTCAAG       | AAGACCCATTGCAGCACCTT      |
| SOX2          | GAGAGAAAGAAAGGGAGAGAAG    | GAGAGAGGCCAAACTGGAATC     |
| BRN2          | ACACTGACCGATCTCCACGCAGTA  | GAGGGTGTGGGACCCTAAATATGAC |



**Supplementary Table 2. Primers used for ChIP qPCR.**

|                                               |                          |
|-----------------------------------------------|--------------------------|
| <b>ChIP-qPCR primers <i>BRN2</i> promoter</b> |                          |
| qF                                            | CTGTGGCCGATAAGAGCAC      |
| qR                                            | CCCGATTCAGATTCTCTCAGTTC  |
| <b>ChIP qPCR primer <i>GAPDH</i> promoter</b> |                          |
| qF                                            | TACTAGCGGTTTTACGGGCG     |
| qR                                            | TCGAACAGGAGGAGCAGAGAGCGA |
